# Supplementary material for: Recovery of anthocyanins from Eugenia spp. fruit peels: a comparison between heat- and ultrasound-assisted extraction
Source: Royal Society of Chemistry journal article supplement (doi:10.1039/d3fb00115f), 2023-10-30
Supplement: d3fb00115f1.pdf [file d3fb00115f1.pdf]

## Supplementary material

**Table S1.** Content of anthocyanins in *E. brasiliensis* fruit peel extracts obtained under the CCRD used for heat-assisted extraction (HAE) and ultrasound-assisted extraction (UAE) optimization.

| Run                  | Heat-assisted extraction |            |            |             | Ultrasound-assisted extraction |             |             |             |
|----------------------|--------------------------|------------|------------|-------------|--------------------------------|-------------|-------------|-------------|
|                      | Compound 1               | Compound 2 | Compound 3 | Compound 4  | Compound 1                     | Compound 2  | Compound 3  | Compound 4  |
| 1                    | 13.1±0.9                 | 119±1      | 5.07±0.03  | 2.00±0.05   | 7.31±0.03                      | 63±2        | 3.24±0.02   | 1.54±0.03   |
| 2                    | 15.1±0.7                 | 147±1      | 5.52±0.09  | 2.049±0.004 | 3.14±0.07                      | 45.2±0.2    | 1.433±0.003 | 0.859±0.001 |
| 3                    | 30.9±0.4                 | 114±4      | 5.86±0.05  | 2.54±0.08   | 20.7±0.7                       | 157±7       | 4.8±0.1     | 2.774±0.002 |
| 4                    | 6.2±0.6                  | 51±5       | 1.0±0.1    | 1.058±0.004 | 18±1                           | 207.65±0.08 | 2.0±0.1     | 2.131±0.001 |
| 5                    | 27.8±0.5                 | 183±5      | 6.0±0.1    | 2.1±0.1     | 19.1±0.5                       | 161±2       | 6.6±0.3     | 2.46±0.04   |
| 6                    | 53.0±0.7                 | 230±9      | 12.5±0.2   | 2.64±0.02   | 21.7±0.5                       | 158±3       | 6.7±0.2     | 3.19±0.05   |
| 7                    | 41±2                     | 234±3      | 8.07±0.03  | 3.15±0.07   | 30±1                           | 191±4       | 6.3±0.1     | 1.80±0.09   |
| 8                    | 52.0±0.9                 | 123±1      | 4.09±0.04  | 1.98±0.07   | 25.6±0.3                       | 184±21      | 4.5±0.1     | 2.11±0.02   |
| 9                    | 28.95±0.09               | 175±1      | 5.7±0.1    | 2.7±0.1     | 23±2                           | 201±15      | 7.1±0.2     | 2.7±0.2     |
| 10                   | 32.1±0.8                 | 194±1      | 6.6±0.02   | 3.9±0.1     | 23±1                           | 191±2       | 6.10±0.07   | 2.20±0.08   |
| 11                   | 23.85±0.06               | 159±1      | 5.2±0.1    | 1.98±0.01   | 13.7±0.3                       | 116±2       | 4.7±0.3     | 2.00±0.03   |
| 12                   | 23.03±0.1                | 148±1      | 5.00±0.03  | 2.91±0.03   | 23.8±0.3                       | 195±1       | 5.7±0.1     | 2.50±0.05   |
| 13                   | 2.79±0.01                | 66.3±0.3   | 2.31±0.05  | 1.51±0.01   | 4.06±0.09                      | 68.1±0.1    | 2.60±0.02   | 1.23±0.03   |
| 14                   | 16.8±0.2                 | 163±1      | 5.2±0.1    | 1.24±0.01   | 9.9±0.4                        | 81±2        | 4.60±0.02   | 2.06±0.05   |
| 15                   | 28.07±0.01               | 168±1      | 5.77±0.01  | 3.08±0.09   | 32±1                           | 221±6       | 7.78±0.05   | 3.1±0.1     |
| 16                   | 23.6±0.4                 | 158±4      | 5.29±0.02  | 2.99±0.03   | 27.5±0.6                       | 191±1       | 6.07±0.03   | 2.33±0.04   |
| 17                   | 35.1±0.5                 | 180±6      | 5.9±0.1    | 3.7±0.1     | 28.9±0.9                       | 216±4       | 3.47±0.06   | 2.98±0.07   |
| 18                   | 41.3±0.9                 | 170±6      | 8.4±0.2    | 4.45±0.1    | 28.0±0.8                       | 196±10      | 6.41±0.07   | 2.478±0.006 |
| 19                   | 25.9±0.1                 | 180±2      | 5.77±0.05  | 3.035±0.05  | 27.0±0.1                       | 194±3       | 6.236±0.002 | 2.15±0.08   |
| 20                   | 14.2±0.2                 | 184±9      | 3.23±0.02  | 0.672±0.001 | 25±3                           | 191±13      | 6.7±0.1     | 2.1±0.2     |
| <i>Optimum point</i> | 25±2                     | 228±1      | 12.3±0.2   | 2.4±0.2     | 23.5±0.2                       | 198±2       | 6.2±0.4     | 0.74±0.01   |

The results are expressed as mg/g of extract ±standard deviation. Compound 1: delphinidin-3-*O*-glucoside. Compound 2: cyanidin-3-*O*-galactoside. Compound 3: cyanidin-3-*O*-glucoside. Compound 4: cyanidin-3-*O*-arabinoside.

**Table S2.** Content of anthocyanins in *E. involucrata* fruit peel extracts obtained under the CCRD used for heat-assisted extraction (HAE) and ultrasound-assisted extraction (UAE) optimization.

| Run                  | Heat-assisted extraction |             |             |               |             | Ultrasound-assisted extraction |             |               |               |               |
|----------------------|--------------------------|-------------|-------------|---------------|-------------|--------------------------------|-------------|---------------|---------------|---------------|
|                      | Compound 1               | Compound 2  | Compound 3  | Compound 4    | Compound 5  | Compound 1                     | Compound 2  | Compound 3    | Compound 4    | Compound 5    |
| 1                    | 3.4±0.1                  | 12.5±0.2    | 0.649±0.001 | 0.656±0.001   | 0.402±0.009 | 0.349±0.005                    | 5.2±0.6     | 0.243±0.003   | 0.143±0.003   | 0.207±0.002   |
| 2                    | 1.13±0.01                | 10.0±0.4    | 0.47±0.02   | 0.477±0.01    | 0.20±0.02   | 0.262±0.004                    | 4.2±0.3     | 0.154±0.003   | 0.149±0.003   | 0.119±0.008   |
| 3                    | 2.87±0.2                 | 14.2±0.2    | 0.900±0.005 | 1.289±0.02    | 1.01±0.06   | 0.73±0.05                      | 11.2±0.2    | 0.155±0.002   | 0.126±0.002   | 0.068±0.002   |
| 4                    | 1.07±0.01                | 7.1±0.2     | 0.228±0.008 | 0.246±0.003   | 0.157±0.008 | 0.37±0.01                      | 5.3±0.4     | 0.112±0.003   | 0.0993±0.0003 | 0.059±0.002   |
| 5                    | 0.32±0.01                | 2.6±0.1     | 0.33±0.01   | 0.321±0.01    | 0.62±0.02   | 0.07±0.002                     | 0.60±0.02   | 0.114±0.004   | 0.110±0.005   | 0.205±0.006   |
| 6                    | 0.42±0.01                | 1.677±0.01  | 0.290±0.007 | 0.295±0.007   | 0.54±0.02   | 0.097±0.004                    | 0.70±0.05   | 0.129±0.008   | 0.130±0.001   | 0.265±0.002   |
| 7                    | 0.51±0.01                | 2.18±0.04   | 0.367±0.002 | 0.405±0.007   | 0.70±0.02   | 0.105±0.002                    | 5.52±0.04   | 0.145±0.004   | 0.133±0.004   | 0.278±0.007   |
| 8                    | 0.403±0.004              | 1.333±0.001 | 0.31±0.02   | 0.50±0.04     | 0.46±0.03   | 0.29±0.04                      | 2.49±0.07   | 0.256±0.004   | 0.263±0.002   | 0.33±0.03     |
| 9                    | 3.35±0.07                | 20±1        | 0.457±0.004 | 1.32±0.05     | 1.9±0.1     | 0.77±0.01                      | 13.7±0.1    | 0.427±0.009   | 0.56±0.02     | 1.85±0.08     |
| 10                   | 3.2±0.1                  | 11.1±0.3    | 0.73±0.01   | 1.020±0.003   | 1.21±0.05   | 0.38±0.01                      | 9.4±0.2     | 0.185±0.003   | 0.231±0.002   | 0.56±0.03     |
| 11                   | 2.8±0.1                  | 13.4±0.8    | 0.68±0.02   | 0.76±0.03     | 1.06±0.07   | 0.55±0.02                      | 7.4±0.8     | 0.222±0.001   | 0.345±0.004   | 0.44±0.01     |
| 12                   | 2.1±0.2                  | 10±1        | 0.60±0.01   | 0.77±0.06     | 1.34±0.08   | 1.33±0.02                      | 16.0±0.7    | 0.578±0.003   | 0.71±0.01     | 0.522±0.005   |
| 13                   | 0.054±0.001              | 0.041±0.001 | 0.058±0.001 | 0.0465±0.0002 | 0.034±0.001 | 0.0181±0.0001                  | 0.073±0.005 | 0.0200±0.0001 | 0.0190±0.0002 | 0.0168±0.0001 |
| 14                   | 6.34±0.2                 | 19.3±0.3    | 0.84±0.01   | 0.754±0.006   | 0.21±0.01   | 1.9±0.1                        | 1.7±0.3     | 0.135±0.001   | 0.1189±0.0005 | 0.0766±0.0006 |
| 15                   | 3.02±0.04                | 18.4±0.4    | 1.02±0.04   | 1.35±0.08     | 1.54±0.03   | 1.118±0.009                    | 15±3        | 0.65±0.003    | 0.650±0.003   | 3.3±0.2       |
| 16                   | 3.47±0.2                 | 18.4±0.9    | 0.99±0.02   | 1.31±0.04     | 1.59±0.07   | 1.18±0.02                      | 12.9±0.8    | 0.65±0.01     | 0.725±0.005   | 2.4±0.1       |
| 17                   | 3.34±0.02                | 16.7±0.8    | 0.90±0.02   | 1.30±0.04     | 1.72±0.04   | 0.86±0.03                      | 14.8±0.7    | 0.386±0.009   | 0.833±0.001   | 0.909±0.007   |
| 18                   | 3.34±0.05                | 17.1±0.6    | 0.92±0.05   | 1.16±0.01     | 1.51±0.05   | 1.07±0.006                     | 12.9±0.1    | 0.685±0.004   | 0.65±0.02     | 3.03±0.02     |
| 19                   | 3.37±0.02                | 16±1        | 0.96±0.03   | 1.17±0.03     | 1.65±0.02   | 1.14±0.004                     | 10.3±0.8    | 0.64±0.01     | 0.753±0.007   | 3.21±0.04     |
| 20                   | 3.21±0.01                | 17±1        | 0.97±0.03   | 1.3±0.1       | 1.665±0.004 | 0.73±0.01                      | 12.8±0.8    | 0.38±0.01     | 0.4113±0.0001 | 0.37±0.02     |
| <i>Optimum point</i> | 1.81±0.06                | 14.7±0.8    | 0.99±0.02   | 1.04±0.04     | 1.56±0.04   | 1.2±0.1                        | 12.5±0.3    | 0.45±0.02     | 1.133±0.002   | 1.251±0.008   |

The results are expressed as mg/g of extract ±standard deviation. Compound 1: delphinidin-3-*O*-glucoside. Compound 2: cyanidin-3-*O*-galactoside. Compound 3: delphinidin-3-*O*-galactoside. Compound 4: cyanidin-3-*O*-glucoside. Compound 5: cyanidin-3-*O*-arabinoside.
